# Supplementary material for: Wolbachia in butterflies and moths: geographic structure in infection frequency
Source: PubMed Central journal article supplement (PMC4502936; doi:10.1186/s12983-015-0107-z), 2015-07-16

Continental Region

(a)

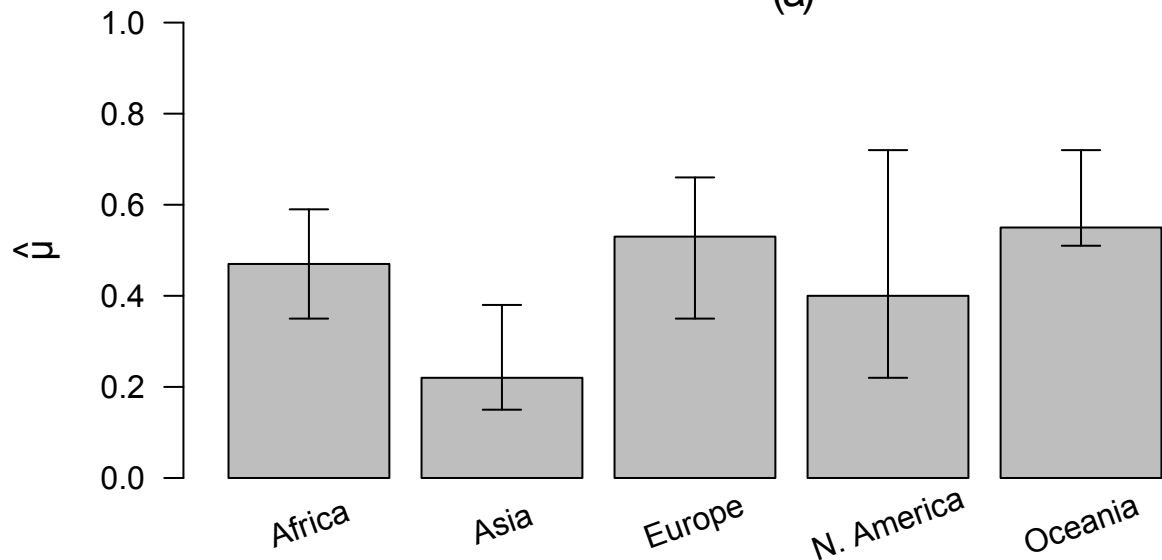

Countries

(b)

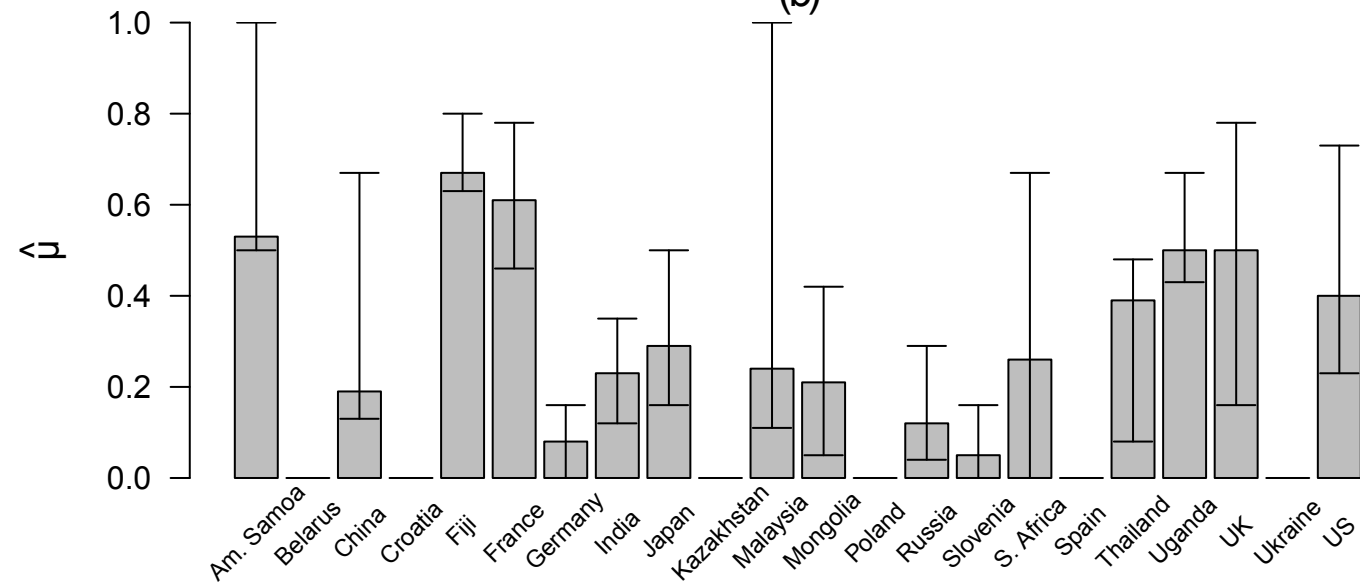

(c)

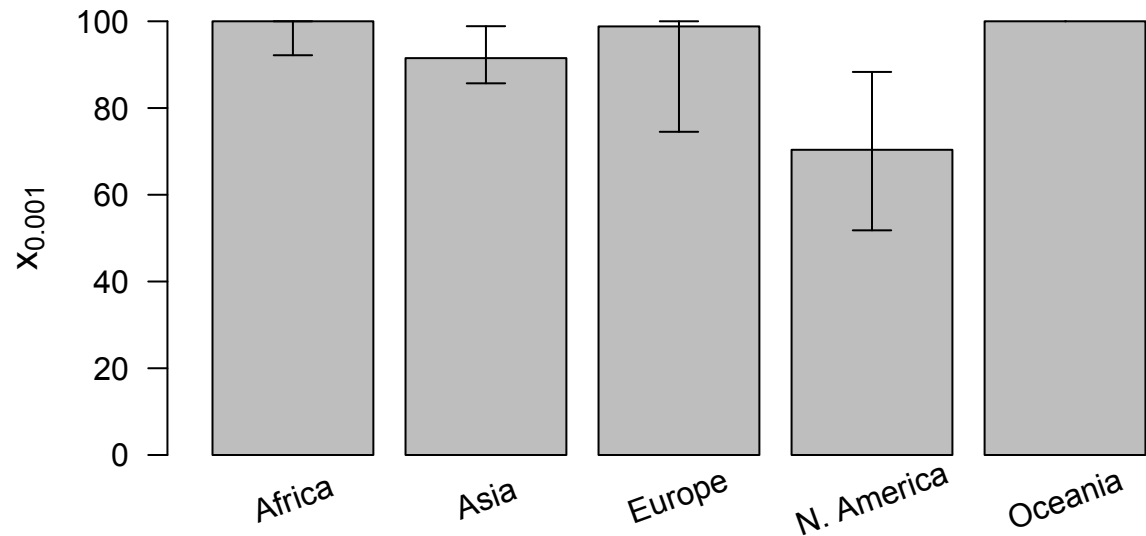

(d)

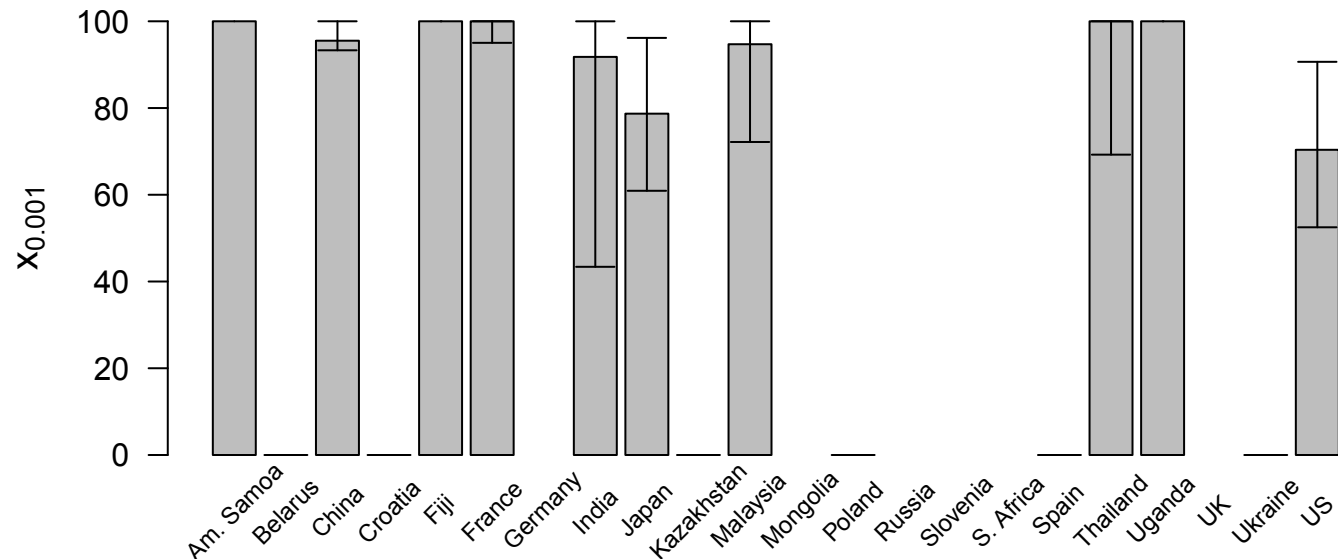

Supplement: 12983_2015_107_MOESM3_ESM.pdf [file 12983_2015_107_MOESM3_ESM.pdf]
